# Supplementary material for: Neutrophil extracellular traps in hepatocellular carcinoma are enriched in oxidized mitochondrial DNA which is highly pro-inflammatory and pro-metastatic
Source: PubMed Central journal article supplement (PMC8899377; doi:10.7150/jca.64170), 2022-01-24
Supplement: jcav13p1261s1.pdf [file jcav13p1261s1.pdf]

**Table S1. Clinicopathological characteristics of HCC patients for NETs pathological analysis (n = 53)**

| Characteristics                | Case number | %     |
|--------------------------------|-------------|-------|
| Sex                            |             |       |
| Female                         | 18          | 33.9% |
| Male                           | 35          | 66.1% |
| Age (years)                    |             |       |
| ≤ 55                           | 10          | 18.9% |
| > 55                           | 43          | 81.1% |
| Preoperative serum AFP (ng/mL) |             |       |
| ≤ 20                           | 18          | 33.9% |
| > 20                           | 35          | 66.1% |
| HBsAg                          |             |       |
| Negative                       | 22          | 41.5% |
| Positive                       | 31          | 58.5% |
| Liver cirrhosis                |             |       |
| No                             | 33          | 62.2% |
| Yes                            | 20          | 37.8% |
| Tumor size                     |             |       |
| ≤ 5cm                          | 37          | 69.8% |
| > 5cm                          | 16          | 30.2% |
| Tumor number                   |             |       |
| Single                         | 47          | 88.6% |
| Multiple                       | 6           | 11.4% |
| Tumor encapsulation            |             |       |
| None                           | 13          | 24.5% |
| Complete                       | 40          | 75.5% |
| Vascular invasion              |             |       |
| No                             | 23          | 43.4% |
| Yes                            | 30          | 56.6% |

**Table S2. Real-time PCR primers used in the study**

| Primers      | Sequences (5'-3')         |
|--------------|---------------------------|
| IL-8         | F-CTCCAGCCACACTCCAACAGA   |
|              | R-CACCCTAACACAAAACACGAT   |
| IL-6         | F-CCACGGCCTTCCCTACTTC     |
|              | R-CTGTTGGGAGTGGTATCCTCTGT |
| IL-1 $\beta$ | F-CTAAAGTATGGGCTGGACTG    |
|              | R-AGCTTCAATGAAAGACCTCA    |
| COX2         | F-GAGAAAAGTCTCAACACCG     |
|              | R-GCATACTCTGTTGTGTTCCC    |
